# Supplementary material
Source: Springer Nature journal article supplement (https://www.springermedizin.de/resource/supplementary/13034_2011_162_MOESM1_ESM.pdf/9652438)

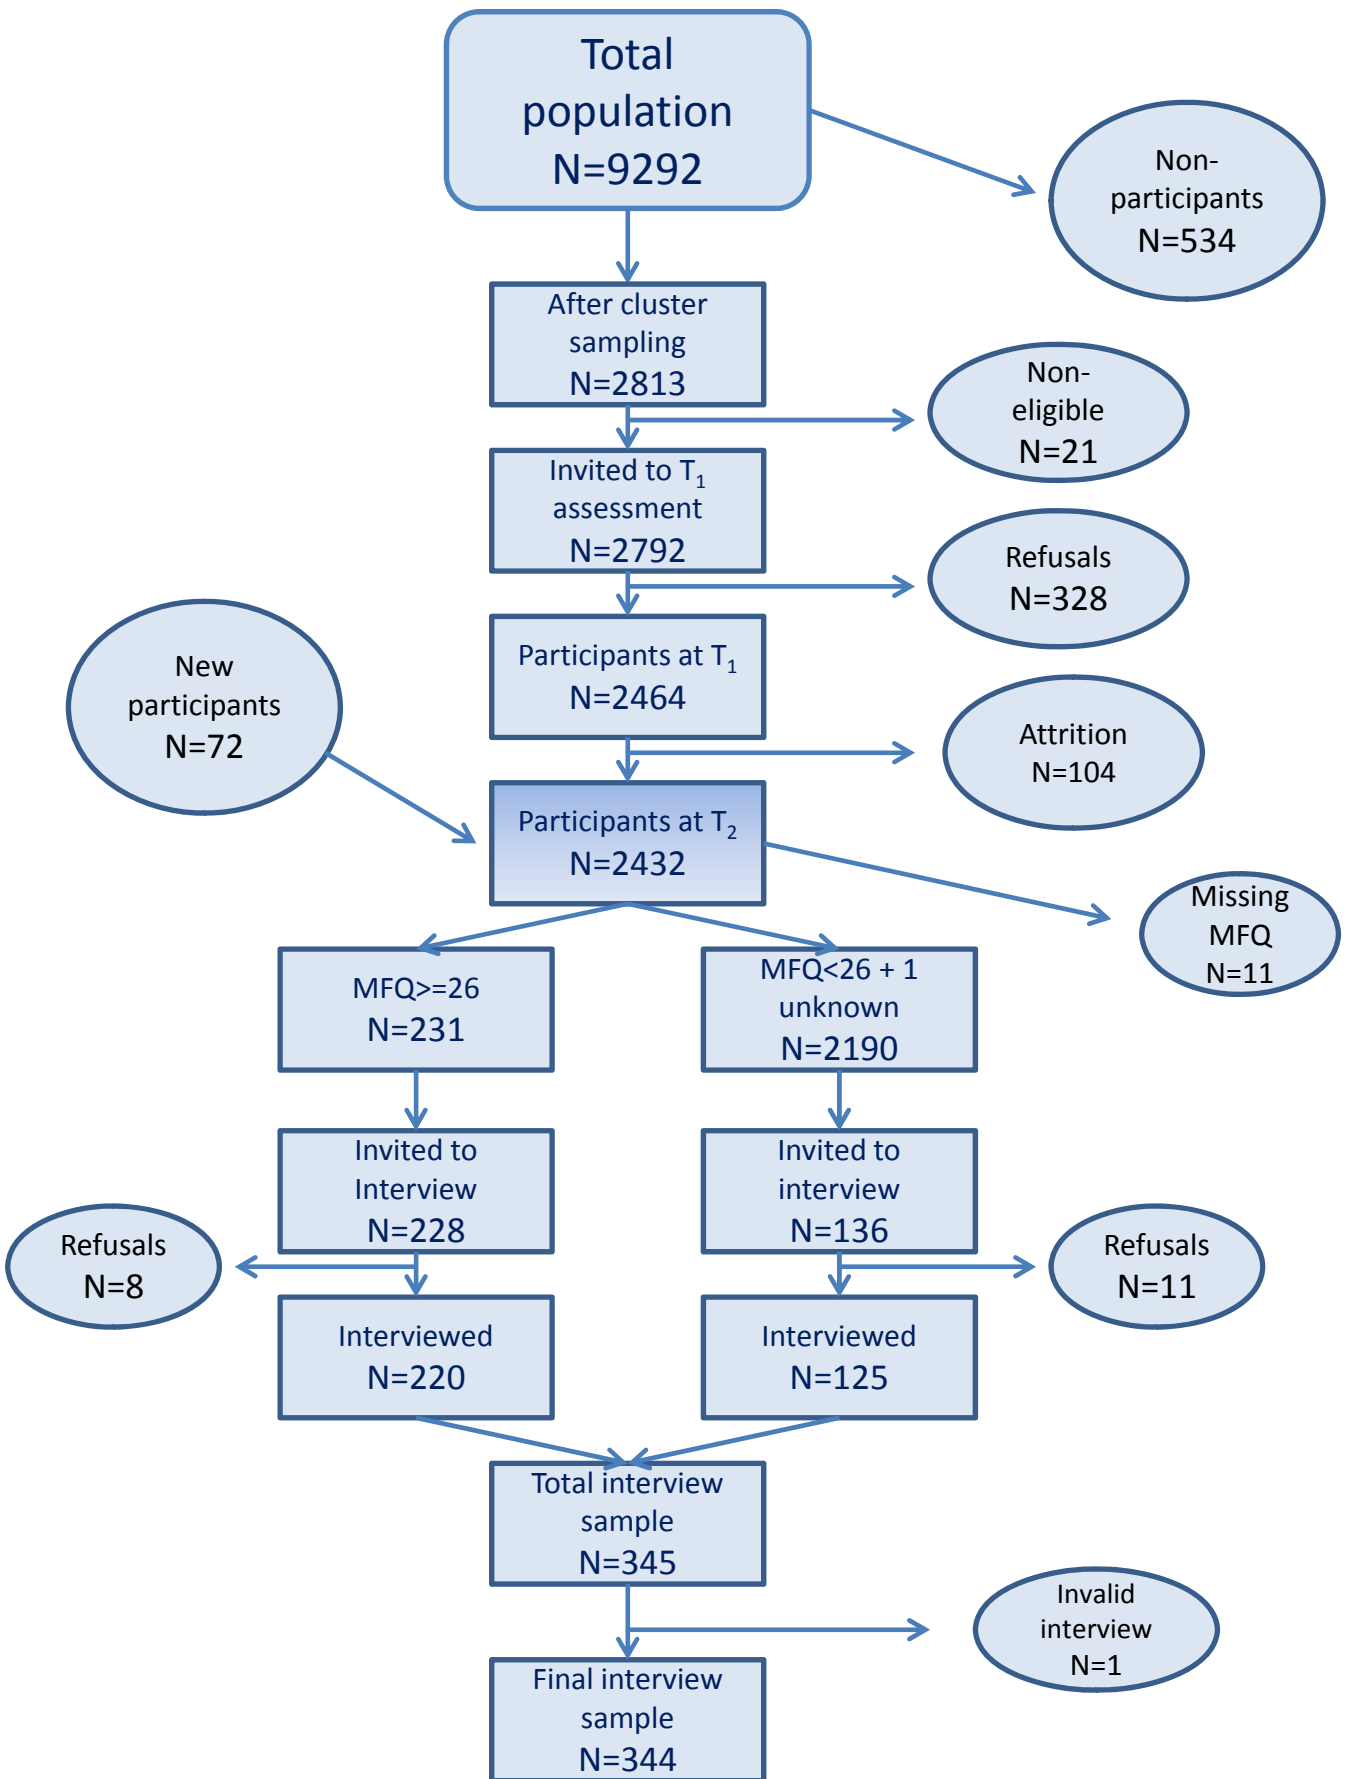

Figure 1

Supplement: MOESM1 [file 9652438]
